# Supplementary material for: Predicting Natural Evolution in the RBD Region of the Spike Glycoprotein of SARS-CoV-2 by Machine Learning
Source: MDPI journal article supplement (doi:10.3390/v16030477), 2024-03-20
Supplement: s1 [file s1]

# Supporting Information

## Forecasting Natural Evolution in the RBD Region of the Spike

### glycoprotein of SARS-CoV-2 by Machine Learning

Yiheng Liu, Zitong He, Liyiyang Jia, Yiwei Xue, Yuxuan Du, Huiwen Tan, Xianzhi Zhang, Yu Ji1,  
Haijun Xu\* Luo Liu\*

|                  |                                             |           |
|------------------|---------------------------------------------|-----------|
| <b>Figure S1</b> | <b>Regression status<br/>of each model</b>  | <b>P1</b> |
| <b>Figure S2</b> | <b>Site selection for<br/>rigid docking</b> | <b>P3</b> |
| <b>Table S1</b>  | <b>Data set</b>                             | <b>P4</b> |
| <b>Table S2</b>  | <b>High frequency<br/>mutation sites</b>    | <b>P7</b> |
| <b>Table S3</b>  | <b>Validation Data</b>                      | <b>P8</b> |

# ISOY800101

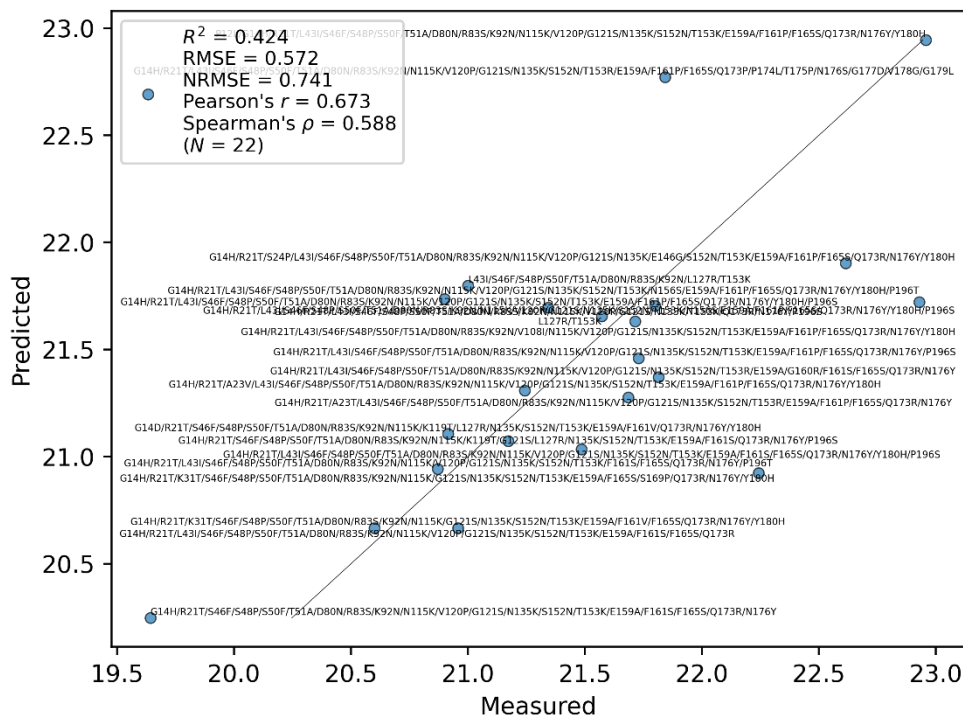

# AURR980108

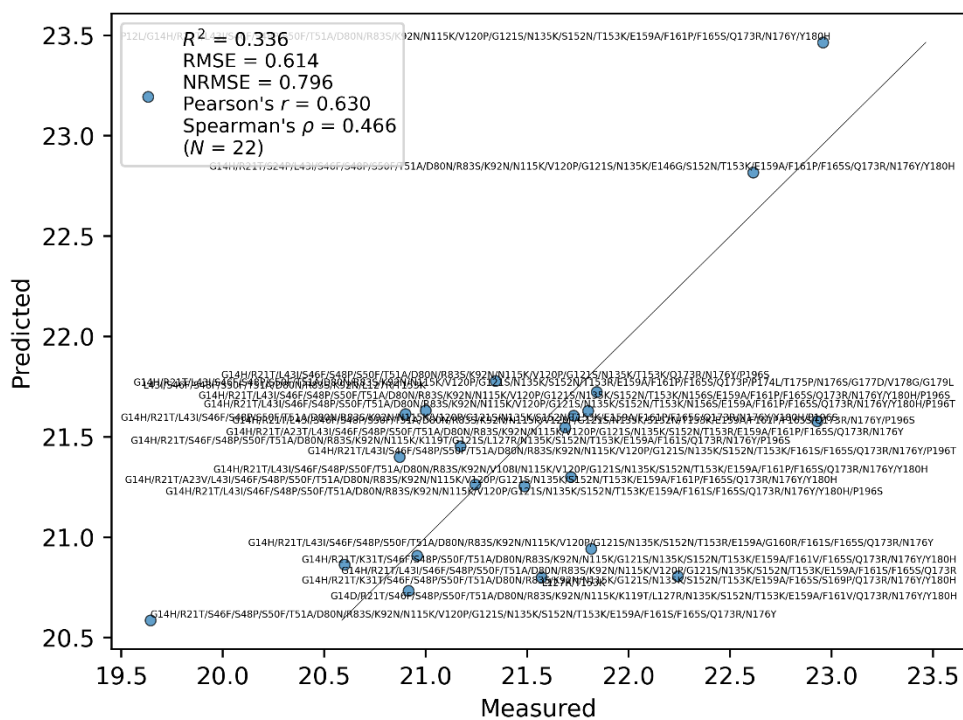

# QIAN880132

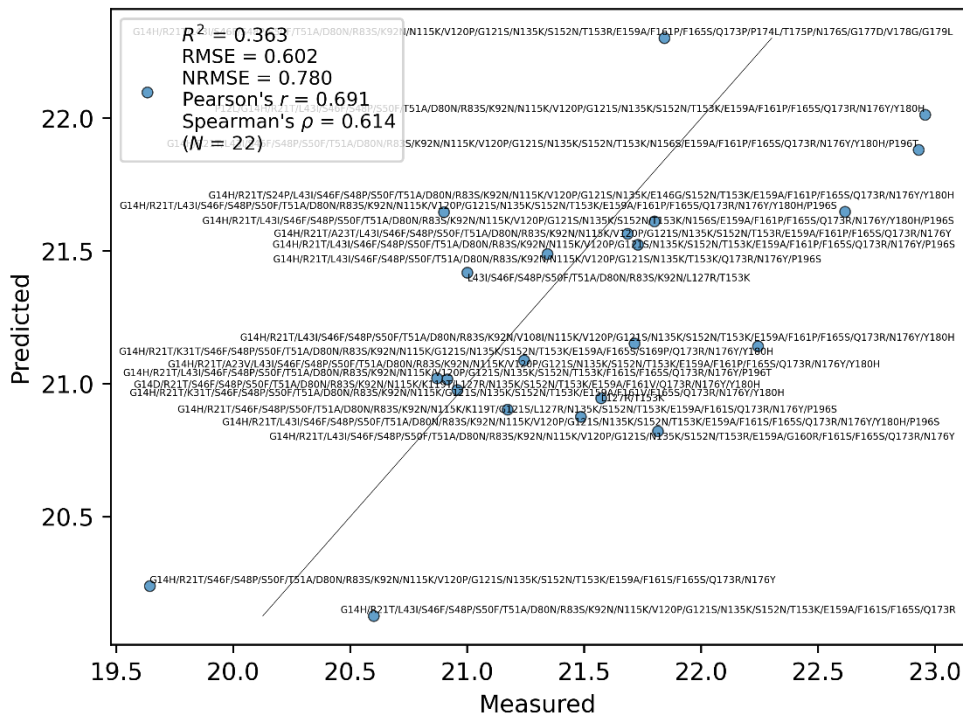

# ROSM880101

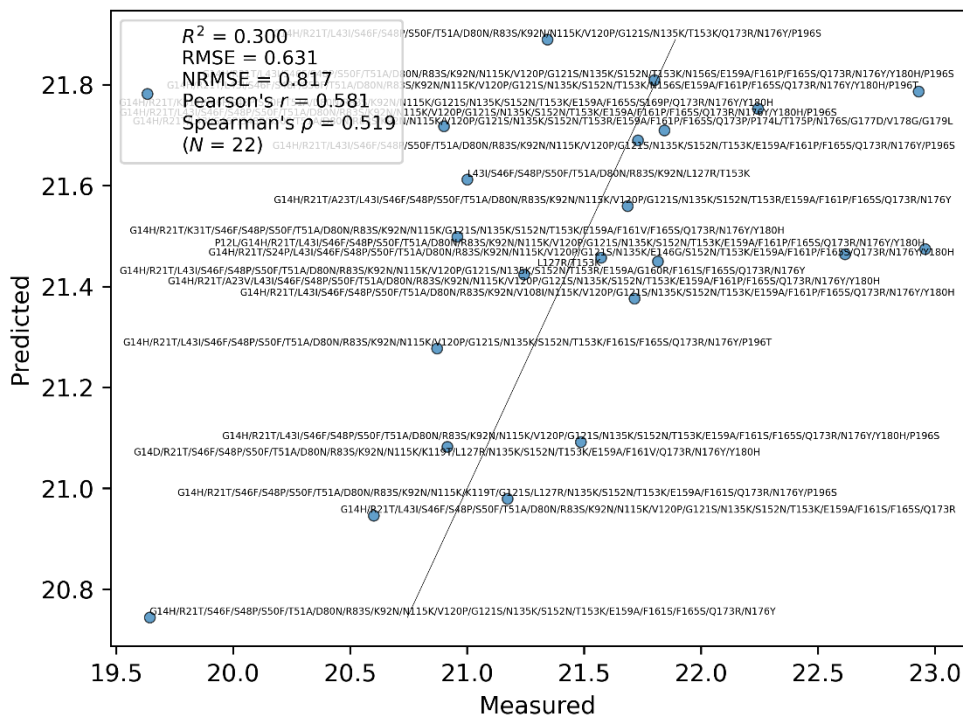

Figure S1: Regression status of each model

This set of figures is a fitting diagram generated by PyPEF. This figure fully demonstrates the difference in fitting results and the best adaptability of ISOY800101.

| Restraints in ligand: |     |     | Restraints in receptor: |     |     |
|-----------------------|-----|-----|-------------------------|-----|-----|
| 1                     | LYS | 99  | 1                       | GLN | 24  |
| 2                     | VAL | 127 | 2                       | THR | 27  |
| 3                     | TYR | 131 | 3                       | PHE | 28  |
| 4                     | TYR | 135 | 4                       | ASP | 30  |
| 5                     | LEU | 137 | 5                       | LYS | 31  |
| 6                     | PHE | 138 | 6                       | HIS | 34  |
| 7                     | ALA | 157 | 7                       | GLU | 37  |
| 8                     | CYS | 162 | 8                       | ASP | 38  |
| 9                     | PRO | 168 | 9                       | TYR | 41  |
| 10                    | ASN | 169 | 10                      | GLN | 42  |
| 11                    | TYR | 171 | 11                      | LEU | 79  |
| 12                    | GLN | 175 | 12                      | MET | 82  |
| 13                    | GLY | 178 | 13                      | ASN | 330 |
| 14                    | GLN | 180 | 14                      | LYS | 353 |
| 15                    | THR | 182 | 15                      | GLY | 354 |
| 16                    | ASN | 183 | 16                      | ARG | 357 |
| 17                    | ASP | 184 | 17                      | ARG | 393 |
| 18                    | TYR | 187 |                         |     |     |

**Figure S2: Site selection for rigid docking**

**Table S1 Data Set :** This table is the dataset used in this study.

| Variant                                                                                                                           | week/10  |
|-----------------------------------------------------------------------------------------------------------------------------------|----------|
| G14H/R21T/L43I/S46F/S48P/S50F/T51A/D80N/R83S/K92N/N115K/V120P/G121S/N135K/S152N/T153K/E159A/F161S/F165S/Q173R/N176Y/Y180H         | 19.35714 |
| G14H/R21T/L43I/S46F/S48P/S50F/T51A/D80N/R83S/K92N/N115K/V120P/G121S/N135K/S152N/T153K/E159A/F161S/F165S/Q173R/N176Y               | 19.51429 |
| G14H/R21T/L43I/S46F/S48P/S50F/T51A/D80N/K92N/N115K/V120P/G121S/N135K/S152N/T153K/E159A/F161S/F165S/Q173R/N176Y/Y180H              | 19.58571 |
| F13X/G14H/R21T/L43I/S46F/S48P/S50F/T51A/D80N/R83S/K92N/N115K/V120P/G121S/N135K/S152N/T153K/E159A/F161S/F165S/Q173R/N176Y/Y180H    | 19.62857 |
| G14H/R21T/S46F/S48P/S50F/T51A/D80N/R83S/K92N/N115K/V120P/G121S/N135K/S152N/T153K/E159A/F161S/F165S/Q173R/N176Y                    | 19.64286 |
| G14H/R21T/L43I/S46F/S48P/S50F/T51A/D80N/R83S/K92N/V120P/N135K/S152N/T153K/E159A/F161S/Q173R/N176Y/Y180H                           | 20.28571 |
| G14H/R21T/L43I/S46F/S48P/S50F/T51A/D80N/R83S/K92N/N115K/V120X/G121S/N135K/S152N/T153K/E159A/F161S/F165S/Q173R/N176Y/Y180H         | 20.42857 |
| G14H/R21T/A23T/L43I/S46F/S48P/S50F/T51A/D80N/R83S/K92N/N115K/V120P/G121S/N135K/S152N/T153K/E159A/F161P/F165S/Q173R/N176Y/Y180H    | 20.5     |
| G14H/R21T/L43I/S46F/S48P/S50F/T51A/D80N/R83S/K92N/N115K/V120P/G121S/N135K/S152N/T153K/E159A/F161S/F165S/Q173R                     | 20.6     |
| G14H/R21T/L43I/S46F/S48P/S50F/T51A/D80N/R83X/K92N/N115K/V120P/G121S/N135K/S152N/T153K/E159A/F161P/F165S/Q173R/N176Y/Y180H         | 20.72857 |
| G14H/R21T/L43I/S46F/S48P/S50F/T51A/D80N/R83S/K92N/N115K/V120P/G121S/N135K/S152N/T153K/E159A/F161S/F165S/Q173X/N176Y/Y180H         | 20.72857 |
| G14H/R21T/L43I/S46F/S48P/S50F/T51A/D80N/R83S/K92N/N115K/V120P/G121S/N135K/T153K/E159A/F161S/F165S/Q173R/N176Y/Y180H               | 20.84286 |
| G14D/S46F/S48P/S50F/T51A/D80N/R83S/K92N/N115K/K119T/L127R/N135K/S152N/T153K/E159A/F161V/Q173R/N176Y                               | 20.87143 |
| G14H/R21T/L43I/S46F/S48P/S50F/T51A/D80N/R83S/K92N/N115K/V120P/G121S/N135K/S152N/T153K/F161S/F165S/Q173R/N176Y/P196T               | 20.87143 |
| G14H/R21T/L43I/S46F/S48P/S50F/T51A/D80N/R83S/K92N/N115K/V120P/G121S/N135K/S152N/T153K/E159A/F161P/F165S/Q173R/N176Y               | 20.88571 |
| G14H/R21T/L43I/S46F/S48P/S50F/T51A/D80N/R83S/K92N/N115K/V120P/G121S/N135K/S152N/T153K/E159A/F161P/F165S/Q173R/N176Y/Y180H         | 20.88571 |
| G14H/L43I/S46F/S48P/S50F/T51A/D80N/R83S/K92N/N115K/V120P/G121S/N135K/T153K/Q173X/P174X/T175X/N176X                                | 20.9     |
| G14H/R21T/L43I/S46F/S48P/S50F/T51A/D80N/R83S/K92N/N115K/V120P/G121S/N135K/S152N/T153K/E159A/F161P/F165S/Q173R/N176Y/Y180H/P196S   | 20.9     |
| G14H/R21T/L43I/S46F/S48P/S50F/T51A/D80N/R83S/K92N/N115K/V120P/G121S/N135K/S152N/T153K/E159A/F161S/F165S/Q173R/N176Y/P196Q         | 20.9     |
| G14D/S46F/S48P/S50F/T51A/D80N/R83X/K92N/N115K/N125D/L127R/S152N/T153K/E159A/F161V/Q173R/N176Y/Y180H                               | 20.9     |
| G14H/R21T/S46F/S48P/S50F/T51A/D80N/R83S/K92N/N115K/K119T/G121S/L127R/N135K/S152N/T153K/E159A/F161S/Q173R/N176Y/Y180H              | 20.9     |
| G14D/R21T/S46F/S48P/S50F/T51A/D80N/R83S/K92N/N115K/K119T/L127R/N135K/S152N/T153K/E159A/F161V/Q173R/N176Y/Y180H                    | 20.91429 |
| G14D/S46F/S48P/S50F/T51A/D80N/R83S/K92N/N115K/K119T/L127R/N135K/S152N/T153K/E159A/F161V/Q173R/N176Y/Y180H                         | 20.91429 |
| G14D/S46F/S48P/S50F/T51A/D80N/R83X/K92N/N115K/K119T/L127R/N135K/S152N/T153K/E159A/F161V/Q173R/N176Y/Y180H                         | 20.91429 |
| G14D/R21T/S46F/S48P/S50F/T51A/D80N/R83X/K92N/N115K/K119T/L127R/N135K/S152N/T153K/E159A/F161V/Q173R/N176Y/Y180H                    | 20.92857 |
| G14D/S46F/S48P/S50F/T51A/D80N/R83S/K92N/N115K/K119R/G121S/N125D/L127M/N135K/S152N/T153K/E159R/F161S/Q173R/N176Y/Y180H             | 20.94286 |
| F13X/S46F/S48P/S50F/T51A/D80N/R83S/K92N/N115K/L127R/S152N/T153K/E159A/F161V/Q173R/N176Y/Y180H                                     | 20.94286 |
| G14D/S46F/S48P/S50F/T51A/D80N/R83S/K92N/N115K/K119T/L127R/L130X/F131X/R132X/K133X/N135K/S152N/T153K/E159A/F161V/Q173R/N176Y/Y180H | 20.94286 |
| G14H/R21T/K31T/S46F/S48P/S50F/T51A/D80N/R83S/K92N/N115K/G121S/N135K/S152N/T153K/E159A/F161V/F165S/Q173R/N176Y/Y180H               | 20.95714 |
| G14H/R21T/S46F/S48P/S50F/T51A/D80N/R83S/K92N/N115K/G121S/N135K/S152N/T153K/E159A/F161P/F165S/Q173R/N176Y/Y180H                    | 20.95714 |
| G14H/R21T/K31T/S46F/S48P/S50F/T51A/D80N/R83S/K92N/N115K/G121S/N135K/S152N/T153K/E159A/F165S/Q173R/N176Y/Y180H                     | 20.98571 |
| G14H/R21T/K31T/S46F/S48P/S50F/T51A/D80N/R83S/K92N/S113X/N115K/G121S/N135K/S152N/T153K/E159A/F165S/Q173R/N176Y/Y180H               | 20.98571 |
| L43I/S46F/S48P/S50F/T51A/D80N/R83S/K92N/L127R/T153K                                                                               | 21       |
| G14H/R21T/S46F/S48P/S50F/T51A/D80N/R83S/K92N/N115K/K119T/L127X/N135K/S152N/T153K/E159A/F161V/Q173R/N176Y/Y180H                    | 21       |
| G14D/R21T/S34N/S46F/S48P/S50F/T51A/D80N/R83X/K92N/N115K/K119T/L127R/N135K/S152N/T153K/E159A/F161V/Q173R/N176Y/Y180H               | 21       |
| G14H/R21T/S46F/S48P/S50F/T51A/D80N/R83S/K92N/N115K/G121S/L127R/N135K/S152N/T153K/E159A/F161I/Q173R/N176Y/Y180H                    | 21       |
| G14X/R21T/L43I/S46F/S48P/S50F/T51A/D80N/R83S/K92N/N115K/V120P/G121S/N135K/S152N/T153K/E159A/F161P/F165S/Q173R/N176Y/Y180H         | 21       |
| G14D/S46F/S48P/S50F/T51A/D80N/R83S/K92N/N115K/N125D/L127R/S152N/T153K/E159A/F161V/Q173R/N176Y/Y180H                               | 21       |

|                                                                                                                                   |          |
|-----------------------------------------------------------------------------------------------------------------------------------|----------|
| G14H/R21T/K31T/S46F/S48P/S50F/T51A/D80N/R83S/K92N/K99X/L100X/S113X/N115K/G121S/N135K/S152N/T153K/E159A/F165S/Q173R/N176Y/Y180H    | 21.1     |
| G14H/R21T/K31T/S46F/S48P/S50F/T51A/D80N/R83S/K92N/W111X/N112X/S113X/N114X/N115K/G121S/N135K/S152N/T153K/E159A/F161V/F165S/Q173R   | 21.1     |
| G14H/R21T/S46F/S48P/S50F/T51A/D80N/R83S/K92N/N115K/K119T/G121S/L127R/N135K/S152N/T153K/E159A/F161S/Q173R/N176Y/P196S              | 21.17143 |
| G14H/L43I/S46F/S48P/S50F/T51A/D80N/R83S/K92N/N115K/V120P/G121S/N135K/S152N/T153K/E159A/F161P/F165S/Q173R/N176Y/Y180H              | 21.18571 |
| G14D/R21T/S46F/S48P/S50F/T51A/D80N/R83S/K92N/N115K/K119T/L127R/N135K/S152N/T153K/E159A/F161V/Q173R/N176Y/Y180H/P196T              | 21.21429 |
| G14H/R21T/A23V/L43I/S46F/S48P/S50F/T51A/D80N/R83S/K92N/N115K/V120P/G121S/N135K/S152N/T153K/E159A/F161P/F165S/Q173R/N176Y/Y180H    | 21.24286 |
| G14H/R21T/L43I/S46F/S48P/S50F/T51A/D80N/R83S/K92N/N115K/K119T/L127R/N135K/S152N/T153K/E159A/F161V/F165S/Q173R/N176Y/Y180H         | 21.27143 |
| G14H/R21T/L43I/S46F/S48P/S50F/T51A/D80N/R83S/K92N/N115K/V120P/G121S/N135K/S152N/T153K/N156T/E159A/F161P/F165S/Q173R/N176Y/Y180H   | 21.3     |
| G14D/R21X/S46F/S48P/S50F/T51A/D80N/R83S/K92N/N115K/L127X/N135K/S152N/T153K/E159A/F161A/Q173R/N176Y/Y180H                          | 21.31429 |
| G14H/R21T/L43I/S46F/S48P/S50F/T51A/D80N/R83S/K92N/N115K/V120P/G121S/N135K/T153K/Q173R/N176Y/P196S                                 | 21.34286 |
| G14H/R21T/L43I/S46F/S48P/S50F/T51A/D80N/R83S/K92N/N115K/V120P/G121S/N135K/S152N/T153R/E159A/F161P/F165S/Q173R/N176Y               | 21.37143 |
| G14H/R21T/L43I/S46F/S48P/S50F/T51A/D80N/R83S/K92N/N115K/V120P/G121S/N135K/S152N/T153K/E159V/F161P/F165S/Q173R/N176Y/Y180H         | 21.38571 |
| G14H/R21T/L43I/S46F/S48P/S50F/T51A/D80N/R83S/K92N/N115K/V120P/G121S/N135K/S152N/T153K/E159A/F161S/F165S/Q173R/N176Y/Y180H/P196S   | 21.48571 |
| I1X/G14D/R21T/S46F/S48P/S50F/T51A/D80N/R83S/K92N/N115K/K119T/L127R/N135K/S152N/T153K/E159A/F161V/Q173R/N176Y/Y180H                | 21.48571 |
| G14H/R21T/A23S/L43I/S46F/S48P/S50F/T51A/D80N/R83S/K92N/N115K/V120P/G121S/N135K/S152N/T153K/E159A/F161P/F165S/Q173R/N176Y/Y180H    | 21.5     |
| G14H/R21T/L43I/S46F/S48P/S50F/T51A/D80N/R83S/K92N/N115K/V120X/G121S/N135K/S152N/T153K/E159A/F161P/F165S/Q173R/N176Y/Y180H         | 21.5     |
| G14H/R21T/S46F/S48P/S50F/T51A/D80N/R83S/K92N/N115K/V120X/G121X/N135K/S152N/T153K/E159A/F161X/F165X/Q173R/N176Y/Y180H              | 21.5     |
| L127R/S152I/T153K                                                                                                                 | 21.57143 |
| L127R/T153K                                                                                                                       | 21.57143 |
| G14H/R21T/S46F/S48P/S50F/T51A/D80N/R83N/K92N/N115K/K119T/G121S/L127R/N135K/S152N/T153K/E159A/F161S/Q173R/N176Y/Y180H              | 21.64286 |
| G14H/L43I/S46F/S48P/S50F/T51A/D80N/R83S/K92N/N115K/V120P/G121S/N135K/T153K/Q173R/N176Y                                            | 21.67143 |
| N18X/L43I/S46F/S48P/S50F/T51A/D80N/R83S/K92N/N115K/V120P/G121S/N135K/T153K/Q173R/N176Y                                            | 21.67143 |
| G14H/R21T/A23T/L43I/S46F/S48P/S50F/T51A/D80N/R83S/K92N/N115K/V120P/G121S/N135K/S152N/T153R/E159A/F161P/F165S/Q173R/N176Y          | 21.68571 |
| G14H/R21T/L43I/S46F/S48P/S50F/T51A/D80N/R83S/K92N/L127R/T153K/Q173R/N176Y/P196S                                                   | 21.71429 |
| L43I/S46F/S48P/S50F/T51A/D80N/R83S/K92N/L127R/T153K/N176Y                                                                         | 21.71429 |
| G14H/R21T/L43I/S46F/S48P/S50F/T51A/D80N/R83S/K92N/V108I/N115K/V120P/G121S/N135K/S152N/T153K/E159A/F161P/F165S/Q173R/N176Y/Y180H   | 21.71429 |
| G14H/F22C/L43I/S46F/S48P/S50F/T51A/D80N/R83S/K92N/N115K/V120P/G121S/N135K/T153K/Q173R/N176Y                                       | 21.72857 |
| G14H/L43I/S46F/S48P/S50F/T51A/D80N/R83S/K92N/N115K/V120P/G121S/N135K/T153K/Q173R/N176Y/Y180H                                      | 21.72857 |
| G14H/R21T/L43I/S46F/S48P/S50F/T51A/D80N/R83S/K92N/N115K/V120P/G121S/N135K/S152N/T153K/E159A/F161P/F165S/Q173R/N176Y/P196S         | 21.72857 |
| G14H/R21T/L43I/S46F/S48P/S50F/T51A/D80N/R83S/K92N/N115K/V120P/G121S/N135K/S152N/T153R/E159A/F161P/F165S/Q173R/N176Y/Y180H         | 21.72857 |
| G14H/R21T/L43I/S46F/S48P/S50F/T51A/D80N/R83S/K92N/N115K/V120P/G121S/N135K/T153K/Q173R/N176Y                                       | 21.72857 |
| G14D/T20X/R21X/F22X/A23X/L43I/S46F/S48P/S50F/T51A/D80N/R83S/K92N/L127R/T153K/Q173R/N176Y                                          | 21.74286 |
| G14H/R21T/L43I/S46F/S48P/S50F/T51A/D80N/R83S/K92N/N115K/V120P/G121S/N135K/T153K/Q173R/T175X/N176X/G177X/V178X/G179X/P196S         | 21.74286 |
| L43I/S46F/S48P/S50F/T51A/D80N/R83S/K92N/N115K/V120P/G121S/N135K/T153K/Q173X/N176Y/Y180H                                           | 21.74286 |
| G14H/L43I/S46F/S48P/S50F/T51A/D80N/R83S/K92N/N115K/V120P/G121S/N135K/T153K/G179X                                                  | 21.78571 |
| G14H/R21X/F22X/A23X/S24X/L43I/S46F/S48P/S50F/T51A/D80N/R83S/K92N/L127R/T153K/G171X/Q173R/P174H/N176Y                              | 21.78571 |
| L43I/S46F/S48P/S50F/T51A/D80N/R83S/K92N/N115K/V120P/G121S/T153K/Q173X/P174X/T175X/N176X/G177X/V178X/G179X                         | 21.78571 |
| G14H/R21T/L43I/S46F/S48P/S50F/T51A/D80N/R83S/K92N/N115K/V120P/G121S/N135K/S152N/T153K/N156S/E159A/F161P/F165S/Q173R/N176Y/Y180H/P | 21.8     |
| G14H/R21T/L43I/S46F/S48P/S50F/T51A/D80N/R83S/K92N/N115K/V120P/G121S/N135K/T153K/Q173X/P174X/T175X/N176X/G177X/V178X/G179X/P196S   | 21.8     |
| G14H/R21T/L43I/S46F/S48P/S50F/T51A/D80N/K92N/N115K/V120P/G121S/N135K/I147X/Y148X/Q149X/A150X/G151X/E159A/F161P/F165S/Q173R/N176Y/ | 21.81429 |

|                                                                                                                                     |          |
|-------------------------------------------------------------------------------------------------------------------------------------|----------|
| G14H/R21T/L43I/S46F/S48P/S50F/T51A/D80N/R83S/K92N/N115K/V120P/G121S/N135K/S152N/T153I/E159A/F161P/F165S/Q173R/N176Y/P196S           | 21.81429 |
| G14H/R21T/L43I/S46F/S48P/S50F/T51A/D80N/R83S/K92N/N115K/V120P/G121S/N135K/S152N/T153K/E159A/F161P/F165S/S169P/Q173R/N176Y/P196S     | 21.81429 |
| G14H/R21T/L43I/S46F/S48P/S50F/T51A/D80N/R83S/K92N/N115K/V120P/G121S/N135K/S152N/T153R/E159A/G160R/F161S/F165S/Q173R/N176Y           | 21.81429 |
| T20X/R21X/F22X/A23X/S24X/V25X/Y26X/L43I/S46F/S48P/S50F/T51A/D80N/R83S/K92N/F104X/T105X/G106X/C107X/V108X/L127R/T153K/Q173R/N176Y    | 21.81429 |
| G14H/R21T/L43I/S46F/S48P/S50F/T51A/D80N/R83S/K92N/N115K/V120P/G121S/N135K/T153K/Q173R/N176Y/Y180H/P196S                             | 21.82857 |
| G14H/F22C/L43I/S46F/S48P/S50F/T51A/D80N/R83S/K92N/N115K/V120P/G121S/N135K/S152N/T153R/E159A/F161P/F165S/Q173R/N176Y                 | 21.84286 |
| G14H/R21T/L43I/S46F/S48P/S50F/T51A/D80N/R83S/K92N/N115K/V120P/G121S/N135K/S152N/T153R/E159A/F161P/F165S/Q173P/P174L/T175P/N176S/G17 | 21.84286 |
| G14H/R21T/L43I/S46F/S48P/S50F/T51A/D80N/R83S/K92N/N115K/V120P/G121S/N135K/T153K/Q173L/P174X/T175X/N176X                             | 21.84286 |
| G14H/R21T/L43I/S46F/S48P/S50F/T51A/Y55H/D80N/R83S/K92N/N115K/V120P/G121S/N135K/S152N/T153K/E159A/F161P/F165S/Q173R/N176Y/Y180H/P1   | 21.84286 |
| G14H/R21T/L43I/S46F/S48P/S50F/T51A/D80N/R83S/K92N/N115K/V120P/G121S/N135K/S152N/T153Q/E159A/F161P/F165S/Q173R/N176Y/P196S           | 21.87143 |
| G14H/R21T/L43I/S46F/S48P/S50F/T51A/D80N/R83S/K92N/N115K/V120P/G121S/N135K/S152N/T153K/N156S/E159A/F161P/F165S/Q173R/N176Y/Y180X/P   | 21.9     |
| G14H/L43I/S46F/S48P/S50F/T51A/D80N/R83S/K92N/N115K/V120P/G121S/N135K/T153K/Q173X/P174X/T175X/N176X/G177X/V178X/G179X/Y180X/Q181     | 21.9     |
| G14H/R21T/K31T/S46F/S48P/S50F/T51A/D80N/R83S/K92N/N115K/G121S/N135K/S152N/T153K/E159A/F165S/S169P/Q173R/N176Y/Y180H                 | 22.24286 |
| I1X/G14H/R21T/L43I/S46F/S48P/S50F/T51A/D80N/R83S/K92N/N115K/V120P/G121S/N135K/S152N/T153K/E159A/F161P/F165S/Q173R/N176Y/Y180H       | 22.32857 |
| P12X/G14H/V16X/R21T/L43I/S46F/S48P/S50F/T51A/D80N/R83S/K92N/N115K/V120P/G121S/N135K/S152N/T153K/E159A/F161P/F165S/Q173R/N176Y/Y18   | 22.38571 |
| G14H/R21T/L43I/S46F/S48P/S50F/T51A/D80N/R83X/K92N/N115K/N135K/S152N/T153R/F165S/Q173R/N176Y/Y180H                                   | 22.44286 |
| G14H/R21T/L43I/S46F/S48P/S50F/T51A/D80N/R83S/K92N/N115K/V120P/G121S/N135K/S152N/T153K/G157S/E159A/F161P/F165S/Q173R/N176Y/Y180H     | 22.45714 |
| G14H/R21T/L43I/S46F/S48P/S50F/T51A/D80N/R83S/K92N/N115K/V120P/G121S/F131L/N135K/S152N/T153K/E159A/F161P/F165S/Q173R/N176Y/Y180H     | 22.48571 |
| F4X/G14H/R21T/L43I/S46F/S48P/S50F/T51A/D80N/R83S/K92N/N115K/V120P/G121S/N135K/S152N/T153K/E159A/F161P/F165S/Q173R/N176Y/Y180H       | 22.58571 |
| G14H/E15X/V16X/R21T/L43I/S46F/S48P/S50F/T51A/D80N/R83S/K92N/N115K/V120P/G121S/N135K/S152N/T153K/E159A/F161P/F165S/Q173R/N176Y/Y18   | 22.61429 |
| G14H/R21T/S24P/L43I/S46F/S48P/S50F/T51A/D80N/R83S/K92N/N115K/V120P/G121S/N135K/E146G/S152N/T153K/E159A/F161P/F165S/Q173R/N176Y/Y18  | 22.61429 |
| G14H/R21T/L43I/S46F/S48P/S50F/T51A/D80N/R83S/K92N/N115K/V120P/G121S/F131L/N135K/S152N/T153R/E159A/F161P/F165S/Q173R/N176Y/Y180H     | 22.72857 |
| G14H/A19S/R21T/L43I/S46F/S48P/S50F/T51A/D80N/R83S/K92N/N115K/V120P/G121S/N135K/S152N/T153R/E159A/F161P/F165S/Q173R/N176Y/Y180H/P19  | 22.82857 |
| G14H/R21T/L43I/S46F/S48P/S50F/T51A/D80N/R83S/K92N/N115K/V120P/G121S/N135K/S152N/T153K/N156S/E159A/F161P/F165S/Q173R/N176Y/Y180H/P   | 22.92857 |
| G14H/R21T/L43I/S46F/S48P/S50F/T51A/D80N/R83S/K92N/N115K/V120P/G121S/N135K/S152N/T153K/V158L/E159A/F161P/F165S/Q173R/N176Y/Y180H     | 22.92857 |
| G14H/R21T/L43I/S46F/S48P/S50F/T51A/D80N/R83S/K92N/N115K/V120P/G121S/N135K/Q149R/S152N/T153K/E159A/F161P/F165S/Q173R/N176Y/Y180H     | 22.94286 |
| P12L/G14H/R21T/L43I/S46F/S48P/S50F/T51A/D80N/R83S/K92N/N115K/V120P/G121S/N135K/S152N/T153K/E159A/F161P/F165S/Q173R/N176Y/Y180H      | 22.95714 |
| G14H/R21T/L43I/S46F/S48P/S50F/T51A/D80N/R83S/K92N/N115K/V120P/G121S/N135K/S152N/T153K/E159A/F161P/F165S/Q173R/N176Y/Y180X           | 23.37143 |
|                                                                                                                                     |          |

**Table S2:** High frequency mutation sites and their mutation frequencies in the dataset

| Mutation | Frequency | Mutation | Frequency | Mutation | Frequency |
|----------|-----------|----------|-----------|----------|-----------|
| D80N     | 0.98      | N176Y    | 0.89      | V120P    | 0.63      |
| K92N     | 0.98      | T153K    | 0.89      | Y180H    | 0.63      |
| S46F     | 0.98      | Q173R    | 0.88      | F165S    | 0.58      |
| S48P     | 0.98      | G14H     | 0.77      | F161P    | 0.39      |
| S50F     | 0.98      | S152N    | 0.76      | L127R    | 0.24      |
| T51A     | 0.98      | G121S    | 0.75      | F161S    | 0.17      |
| N115K    | 0.92      | E159A    | 0.75      | F161V    | 0.15      |
| R83S     | 0.90      | R21T     | 0.75      | P196S    | 0.15      |
| N135K    | 0.89      | L43I     | 0.72      | G14D     | 0.13      |



**Table S3 Validation Data :** This table compares the experimental and predicted timestamp data generated for validation.

| ISOY800101     |                                                                                                                                         |            |             |  |
|----------------|-----------------------------------------------------------------------------------------------------------------------------------------|------------|-------------|--|
| Variant Number | Variant                                                                                                                                 | Prediction | Experiment  |  |
| 1              | P12L/G14H/R21T/L43I/S46F/S48P/S50F/T51A/D80N/R83S/K92N/N115K/V120P/G121S/N135K/S152N/T153K/E159A/F161P/F165S/Q173R/N176Y/Y180H          | 22.944748  | 22.95714286 |  |
| 2              | G14H/R21T/L43I/S46F/S48P/S50F/T51A/D80N/R83S/K92N/N115K/V120P/G121S/N135K/S152N/T153R/E159A/F161P/F165S/Q173P/P174L/T175P/N176S/G177D/V | 22.771482  | 21.84285714 |  |
| 3              | G14H/R21T/L43I/S46F/S48P/S50F/T51A/D80N/R83S/K92N/N115K/V120P/G121S/N135K/S152N/T153K/V158L/E159A/F161P/F165S/Q173R/N176Y/Y180H         | 22.757896  | 22.92857143 |  |
| 4              | G14H/A19S/R21T/L43I/S46F/S48P/S50F/T51A/D80N/R83S/K92N/N115K/V120P/G121S/N135K/S152N/T153R/E159A/F161P/F165S/Q173R/N176Y/Y180H/P196S    | 22.7291    | 22.82857143 |  |
| 5              | G14H/R21T/L43I/S46F/S48P/S50F/T51A/D80N/R83S/K92N/N115K/V120P/G121S/F131L/N135K/S152N/T153R/E159A/F161P/F165S/Q173R/N176Y/Y180H         | 21.967904  | 22.72857143 |  |
| 6              | G14H/R21T/L43I/S46F/S48P/S50F/T51A/Y55H/D80N/R83S/K92N/N115K/V120P/G121S/N135K/S152N/T153K/E159A/F161P/F165S/Q173R/N176Y/Y180H/P196S    | 21.943086  | 21.84285714 |  |
| 7              | G14H/R21T/S24P/L43I/S46F/S48P/S50F/T51A/D80N/R83S/K92N/N115K/V120P/G121S/N135K/E146G/S152N/T153K/E159A/F161P/F165S/Q173R/N176Y/Y180H    | 21.903183  | 22.61428571 |  |
| 8              | G14H/R21T/L43I/S46F/S48P/S50F/T51A/D80N/R83S/K92N/N115K/V120P/G121S/F131L/N135K/S152N/T153K/E159A/F161P/F165S/Q173R/N176Y/Y180H         | 21.84303   | 22.48571429 |  |
| 9              | G14H/L43I/S46F/S48P/S50F/T51A/D80N/R83S/K92N/N115K/V120P/G121S/N135K/T153K/Q173R/N176Y/Y180H                                            | 21.828654  | 21.72857143 |  |
| 10             | G14H/F22C/L43I/S46F/S48P/S50F/T51A/D80N/R83S/K92N/N115K/V120P/G121S/N135K/T153K/Q173R/N176Y                                             | 21.828342  | 21.72857143 |  |
| 11             | L43I/S46F/S48P/S50F/T51A/D80N/R83S/K92N/L127R/T153K                                                                                     | 21.798453  | 21          |  |
| 12             | L43I/S46F/S48P/S50F/T51A/D80N/R83S/K92N/L127R/T153K/N176Y                                                                               | 21.772955  | 21.71428571 |  |
| 13             | G14H/F22C/L43I/S46F/S48P/S50F/T51A/D80N/R83S/K92N/N115K/V120P/G121S/N135K/S152N/T153R/E159A/F161P/F165S/Q173R/N176Y                     | 21.742835  | 21.84285714 |  |
| 14             | G14H/R21T/L43I/S46F/S48P/S50F/T51A/D80N/R83S/K92N/N115K/V120P/G121S/N135K/S152N/T153K/E159A/F161P/F165S/Q173R/N176Y/Y180H/P196S         | 21.735561  | 20.9        |  |
| 15             | G14H/R21T/L43I/S46F/S48P/S50F/T51A/D80N/R83S/K92N/N115K/V120P/G121S/N135K/S152N/T153R/E159A/F161P/F165S/Q173R/N176Y/Y180H               | 21.733938  | 21.72857143 |  |
| 16             | G14H/R21T/L43I/S46F/S48P/S50F/T51A/D80N/R83S/K92N/N115K/V120P/G121S/N135K/T153K/Q173R/N176Y/Y180H/P196S                                 | 21.728617  | 21.82857143 |  |
| 17             | G14H/R21T/L43I/S46F/S48P/S50F/T51A/D80N/R83S/K92N/N115K/V120P/G121S/N135K/S152N/T153K/N156S/E159A/F161P/F165S/Q173R/N176Y/Y180H/P196T   | 21.721655  | 22.92857143 |  |
| 18             | G14H/R21T/L43I/S46F/S48P/S50F/T51A/D80N/R83S/K92N/N115K/V120P/G121S/N135K/S152N/T153K/E159A/F161P/F165S/S169P/Q173R/N176Y/P196S         | 21.71419   | 21.81428571 |  |
| 19             | G14H/R21T/L43I/S46F/S48P/S50F/T51A/D80N/R83S/K92N/N115K/V120P/G121S/N135K/S152N/T153I/E159A/F161P/F165S/Q173R/N176Y/P196S               | 21.714053  | 21.81428571 |  |
| 20             | G14H/R21T/L43I/S46F/S48P/S50F/T51A/D80N/R83S/K92N/N115K/V120P/G121S/N135K/S152N/T153K/N156S/E159A/F161P/F165S/Q173R/N176Y/Y180H/P196S   | 21.703942  | 21.8        |  |
| 21             | G14H/R21T/L43I/S46F/S48P/S50F/T51A/D80N/R83S/K92N/N115K/V120P/G121S/N135K/T153K/Q173R/N176Y/P196S                                       | 21.695022  | 21.34285714 |  |
| 22             | G14H/R21T/L43I/S46F/S48P/S50F/T51A/D80N/R83S/K92N/N115K/V120P/G121S/N135K/S152N/T153K/G157S/E159A/F161P/F165S/Q173R/N176Y/Y180H         | 21.686387  | 22.45714286 |  |
| 23             | G14H/R21T/L43I/S46F/S48P/S50F/T51A/D80N/R83S/K92N/N115K/V120P/G121S/N135K/Q149R/S152N/T153K/E159A/F161P/F165S/Q173R/N176Y/Y180H         | 21.667944  | 22.94285714 |  |
| 24             | L127R/T153K                                                                                                                             | 21.655095  | 21.57142857 |  |
| 25             | G14H/R21T/L43I/S46F/S48P/S50F/T51A/D80N/R83S/K92N/N115K/V120P/G121S/N135K/S152N/T153K/E159A/F161P/F165S/Q173R/N176Y/Y180H               | 21.635735  | 20.88571429 |  |
| 26             | G14H/R21T/L43I/S46F/S48P/S50F/T51A/D80N/R83S/K92N/V108I/N115K/V120P/G121S/N135K/S152N/T153K/E159A/F161P/F165S/Q173R/N176Y/Y180H         | 21.63165   | 21.71428571 |  |
| 27             | G14H/R21T/L43I/S46F/S48P/S50F/T51A/D80N/R83S/K92N/N115K/V120P/G121S/N135K/T153K/Q173R/N176Y                                             | 21.628143  | 21.72857143 |  |
| 28             | G14H/R21T/L43I/S46F/S48P/S50F/T51A/D80N/R83S/K92N/L127R/T153K/Q173R/N176Y/P196S                                                         | 21.614007  | 21.71428571 |  |
| 29             | G14H/L43I/S46F/S48P/S50F/T51A/D80N/R83S/K92N/N115K/V120P/G121S/N135K/T153K/Q173R/N176Y                                                  | 21.513519  | 21.67142857 |  |
| 30             | G14H/R21T/L43I/S46F/S48P/S50F/T51A/D80N/R83S/K92N/N115K/V120P/G121S/N135K/S152N/T153K/E159V/F161P/F165S/Q173R/N176Y/Y180H               | 21.48597   | 21.38571429 |  |
| 31             | G14H/R21T/L43I/S46F/S48P/S50F/T51A/D80N/R83S/K92N/N115K/V120P/G121S/N135K/S152N/T153R/E159A/F161P/F165S/Q173R/N176Y                     | 21.471429  | 21.37142857 |  |
| 32             | L127R/S152I/T153K                                                                                                                       | 21.471207  | 21.57142857 |  |
| 33             | G14H/R21T/L43I/S46F/S48P/S50F/T51A/D80N/R83S/K92N/N115K/V120P/G121S/N135K/S152N/T153K/E159A/F161P/F165S/Q173R/N176Y/P196S               | 21.460224  | 21.72857143 |  |

|    |                                                                                                                                 |           |             |
|----|---------------------------------------------------------------------------------------------------------------------------------|-----------|-------------|
| 34 | G14H/R21T/L43I/S46F/S48P/S50F/T51A/D80N/R83S/K92N/N115K/V120P/G121S/N135K/S152N/T153Q/E159A/F161P/F165S/Q173R/N176Y/P196S       | 21.447679 | 21.87142857 |
| 35 | G14H/R21T/A23S/L43I/S46F/S48P/S50F/T51A/D80N/R83S/K92N/N115K/V120P/G121S/N135K/S152N/T153K/E159A/F161P/F165S/Q173R/N176Y/Y180H  | 21.400384 | 21.5        |
| 36 | G14H/R21T/L43I/S46F/S48P/S50F/T51A/D80N/R83S/K92N/N115K/V120P/G121S/N135K/S152N/T153R/E159A/G160R/F161S/F165S/Q173R/N176Y       | 21.370878 | 21.81428571 |
| 37 | G14H/R21T/L43I/S46F/S48P/S50F/T51A/D80N/R83S/K92N/N115K/V120P/G121S/N135K/S152N/T153K/E159A/F161P/F165S/Q173R/N176Y             | 21.36967  | 20.88571429 |
| 38 | G14H/R21T/A23T/L43I/S46F/S48P/S50F/T51A/D80N/R83S/K92N/N115K/V120P/G121S/N135K/S152N/T153K/E159A/F161P/F165S/Q173R/N176Y/Y180H  | 21.321875 | 20.5        |
| 39 | G14D/R21T/S46F/S48P/S50F/T51A/D80N/R83S/K92N/N115K/K119T/L127R/N135K/S152N/T153K/E159A/F161V/Q173R/N176Y/Y180H/P196T            | 21.314108 | 21.21428571 |
| 40 | G14H/R21T/L43I/S46F/S48P/S50F/T51A/D80N/R83S/K92N/N115K/V120P/G121S/N135K/S152N/T153K/N156T/E159A/F161P/F165S/Q173R/N176Y/Y180H | 21.312678 | 21.3        |
| 41 | G14H/R21T/A23V/L43I/S46F/S48P/S50F/T51A/D80N/R83S/K92N/N115K/V120P/G121S/N135K/S152N/T153K/E159A/F161P/F165S/Q173R/N176Y/Y180H  | 21.309581 | 21.24285714 |
| 42 | G14H/L43I/S46F/S48P/S50F/T51A/D80N/R83S/K92N/N115K/V120P/G121S/N135K/S152N/T153K/E159A/F161P/F165S/Q173R/N176Y/Y180H            | 21.285621 | 21.18571429 |
| 43 | G14H/R21T/A23T/L43I/S46F/S48P/S50F/T51A/D80N/R83S/K92N/N115K/V120P/G121S/N135K/S152N/T153R/E159A/F161P/F165S/Q173R/N176Y        | 21.277498 | 21.68571429 |
| 44 | G14H/R21T/S46F/S48P/S50F/T51A/D80N/R83N/K92N/N115K/K119T/G121S/L127R/N135K/S152N/T153K/E159A/F161S/Q173R/N176Y/Y180H            | 21.260644 | 21.64285714 |
| 45 | G14H/R21T/L43I/S46F/S48P/S50F/T51A/D80N/R83S/K92N/N115K/K119T/L127R/N135K/S152N/T153K/E159A/F161V/F165S/Q173R/N176Y/Y180H       | 21.171035 | 21.27142857 |
| 46 | G14H/R21T/S46F/S48P/S50F/T51A/D80N/R83S/K92N/N115K/K119T/G121S/L127R/N135K/S152N/T153K/E159A/F161S/Q173R/N176Y/Y180H            | 21.132411 | 20.9        |
| 47 | G14D/R21T/S46F/S48P/S50F/T51A/D80N/R83S/K92N/N115K/K119T/L127R/N135K/S152N/T153K/E159A/F161V/Q173R/N176Y/Y180H                  | 21.105799 | 20.91428571 |
| 48 | G14D/S46F/S48P/S50F/T51A/D80N/R83S/K92N/N115K/N125D/L127R/S152N/T153K/E159A/F161V/Q173R/N176Y/Y180H                             | 21.100356 | 21          |
| 49 | G14H/R21T/S46F/S48P/S50F/T51A/D80N/R83S/K92N/N115K/G121S/L127R/N135K/S152N/T153K/E159A/F161I/Q173R/N176Y/Y180H                  | 21.099703 | 21          |
| 50 | G14H/R21T/S46F/S48P/S50F/T51A/D80N/R83S/K92N/N115K/K119T/G121S/L127R/N135K/S152N/T153K/E159A/F161S/Q173R/N176Y/P196S            | 21.0734   | 21.17142857 |
| 51 | G14H/R21T/S46F/S48P/S50F/T51A/D80N/R83S/K92N/N115K/G121S/N135K/S152N/T153K/E159A/F161P/F165S/Q173R/N176Y/Y180H                  | 21.057354 | 20.95714286 |
| 52 | G14H/R21T/L43I/S46F/S48P/S50F/T51A/D80N/R83S/K92N/N115K/V120P/G121S/N135K/S152N/T153K/E159A/F161S/F165S/Q173R/N176Y/Y180H/P196S | 21.033909 | 21.48571429 |
| 53 | G14H/R21T/L43I/S46F/S48P/S50F/T51A/D80N/R83S/K92N/N115K/V120P/G121S/N135K/S152N/T153K/E159A/F161S/F165S/Q173R/N176Y/P196Q       | 21.000221 | 20.9        |
| 54 | G14D/S46F/S48P/S50F/T51A/D80N/R83S/K92N/N115K/K119T/L127R/N135K/S152N/T153K/E159A/F161V/Q173R/N176Y                             | 20.971443 | 20.87142857 |
| 55 | G14H/R21T/L43I/S46F/S48P/S50F/T51A/D80N/R83S/K92N/N115K/V120P/G121S/N135K/T153K/E159A/F161S/F165S/Q173R/N176Y/Y180H             | 20.942907 | 20.84285714 |
| 56 | G14H/R21T/L43I/S46F/S48P/S50F/T51A/D80N/R83S/K92N/N115K/V120P/G121S/N135K/S152N/T153K/F161S/F165S/Q173R/N176Y/P196T             | 20.942365 | 20.87142857 |
| 57 | G14H/R21T/L43I/S46F/S48P/S50F/T51A/D80N/R83S/K92N/N115K/V120P/G121S/N135K/S152N/T153K/E159A/F161S/F165S/Q173R/N176Y/Y180H       | 20.936558 | 19.35714286 |
| 58 | G14D/S46F/S48P/S50F/T51A/D80N/R83S/K92N/N115K/K119T/L127R/N135K/S152N/T153K/E159A/F161V/Q173R/N176Y/Y180H                       | 20.925062 | 20.91428571 |
| 59 | G14H/R21T/K31T/S46F/S48P/S50F/T51A/D80N/R83S/K92N/N115K/G121S/N135K/S152N/T153K/E159A/F165S/S169P/Q173R/N176Y/Y180H             | 20.923653 | 22.24285714 |
| 60 | G14H/R21T/K31T/S46F/S48P/S50F/T51A/D80N/R83S/K92N/N115K/G121S/N135K/S152N/T153K/E159A/F165S/Q173R/N176Y/Y180H                   | 20.885534 | 20.98571429 |
| 61 | G14D/S46F/S48P/S50F/T51A/D80N/R83S/K92N/N115K/K119R/G121S/N125D/L127M/N135K/S152N/T153K/E159R/F161S/Q173R/N176Y/Y180H           | 20.84282  | 20.94285714 |
| 62 | G14H/R21T/L43I/S46F/S48P/S50F/T51A/D80N/R83S/K92N/N115K/V120P/G121S/N135K/S152N/T153K/E159A/F161S/F165S/Q173R/N176Y             | 20.705304 | 19.51428571 |
| 63 | G14H/R21T/K31T/S46F/S48P/S50F/T51A/D80N/R83S/K92N/N115K/G121S/N135K/S152N/T153K/E159A/F161V/F165S/Q173R/N176Y/Y180H             | 20.667012 | 20.95714286 |
| 64 | G14H/R21T/L43I/S46F/S48P/S50F/T51A/D80N/R83S/K92N/N115K/V120P/G121S/N135K/S152N/T153K/E159A/F161S/F165S/Q173R                   | 20.666287 | 20.6        |
| 65 | G14H/R21T/L43I/S46F/S48P/S50F/T51A/D80N/R83S/K92N/V120P/N135K/S152N/T153K/E159A/F161S/Q173R/N176Y/Y180H                         | 20.385832 | 20.28571429 |
| 66 | G14H/R21T/S46F/S48P/S50F/T51A/D80N/R83S/K92N/N115K/V120P/G121S/N135K/S152N/T153K/E159A/F161S/F165S/Q173R/N176Y                  | 20.247648 | 19.64285714 |
| 67 | G14H/R21T/L43I/S46F/S48P/S50F/T51A/D80N/K92N/N115K/V120P/G121S/N135K/S152N/T153K/E159A/F161S/F165S/Q173R/N176Y/Y180H            | 19.685956 | 19.58571429 |

| QIAN880132     |                                                                                                                                       |            |             |
|----------------|---------------------------------------------------------------------------------------------------------------------------------------|------------|-------------|
| Variant Number | Variant                                                                                                                               | Prediction | Experiment  |
| 1              | G14H/A19S/R21T/L43I/S46F/S48P/S50F/T51A/D80N/R83S/K92N/N115K/V120P/G121S/N135K/S152N/T153R/E159A/F161P/F165S/Q173R/N176Y/Y180H/P196S  | 22.728776  | 22.82857143 |
| 2              | G14H/R21T/L43I/S46F/S48P/S50F/T51A/D80N/R83S/K92N/N115K/V120P/G121S/N135K/S152N/T153R/E159A/F161P/F165S/Q173P/P174L/T175P/N176S/G177I | 22.301789  | 21.84285714 |
| 3              | G14H/R21T/L43I/S46F/S48P/S50F/T51A/D80N/R83S/K92N/N115K/V120P/G121S/N135K/S152N/T153K/G157S/E159A/F161P/F165S/Q173R/N176Y/Y180H       | 22.220591  | 22.45714286 |
| 4              | G14H/R21T/L43I/S46F/S48P/S50F/T51A/D80N/R83S/K92N/N115K/V120P/G121S/N135K/S152N/T153I/E159A/F161P/F165S/Q173R/N176Y/P196S             | 22.106037  | 21.81428571 |
| 5              | P12L/G14H/R21T/L43I/S46F/S48P/S50F/T51A/D80N/R83S/K92N/N115K/V120P/G121S/N135K/S152N/T153K/E159A/F161P/F165S/Q173R/N176Y/Y180H        | 22.01303   | 22.95714286 |
| 6              | G14H/R21T/L43I/S46F/S48P/S50F/T51A/D80N/R83S/K92N/N115K/V120P/G121S/N135K/S152N/T153K/N156S/E159A/F161P/F165S/Q173R/N176Y/Y180H/P196S | 21.881469  | 22.92857143 |
| 7              | G14H/R21T/L43I/S46F/S48P/S50F/T51A/D80N/R83S/K92N/N115K/V120P/G121S/N135K/S152N/T153K/E159A/F161P/F165S/S169P/Q173R/N176Y/P196S       | 21.823371  | 21.81428571 |
| 8              | G14H/R21T/L43I/S46F/S48P/S50F/T51A/Y55H/D80N/R83S/K92N/N115K/V120P/G121S/N135K/S152N/T153K/E159A/F161P/F165S/Q173R/N176Y/Y180H/P196S  | 21.811722  | 21.84285714 |
| 9              | G14H/R21T/L43I/S46F/S48P/S50F/T51A/D80N/R83S/K92N/N115K/V120P/G121S/N135K/S152N/T153Q/E159A/F161P/F165S/Q173R/N176Y/P196S             | 21.771058  | 21.87142857 |
| 10             | G14H/F22C/L43I/S46F/S48P/S50F/T51A/D80N/R83S/K92N/N115K/V120P/G121S/N135K/S152N/T153R/E159A/F161P/F165S/Q173R/N176Y                   | 21.742785  | 21.84285714 |
| 11             | G14H/R21T/L43I/S46F/S48P/S50F/T51A/D80N/R83S/K92N/N115K/V120P/G121S/N135K/T153K/Q173R/N176Y/Y180H/P196S                               | 21.728759  | 21.82857143 |
| 12             | G14H/L43I/S46F/S48P/S50F/T51A/D80N/R83S/K92N/N115K/V120P/G121S/N135K/T153K/Q173R/N176Y/Y180H                                          | 21.702097  | 21.72857143 |
| 13             | G14H/R21T/L43I/S46F/S48P/S50F/T51A/D80N/R83S/K92N/N115K/V120P/G121S/N135K/T153K/Q173R/N176Y                                           | 21.682367  | 21.72857143 |
| 14             | L127R/S152I/T153K                                                                                                                     | 21.671877  | 21.57142857 |
| 15             | G14H/R21T/L43I/S46F/S48P/S50F/T51A/D80N/R83S/K92N/N115K/V120P/G121S/F131L/N135K/S152N/T153R/E159A/F161P/F165S/Q173R/N176Y/Y180H       | 21.664971  | 22.72857143 |
| 16             | G14H/R21T/S24P/L43I/S46F/S48P/S50F/T51A/D80N/R83S/K92N/N115K/V120P/G121S/N135K/E146G/S152N/T153K/E159A/F161P/F165S/Q173R/N176Y/Y180H  | 21.64778   | 22.61428571 |
| 17             | G14H/R21T/L43I/S46F/S48P/S50F/T51A/D80N/R83S/K92N/N115K/V120P/G121S/N135K/S152N/T153K/E159A/F161P/F165S/Q173R/N176Y/Y180H/P196S       | 21.647047  | 20.9        |
| 18             | G14H/F22C/L43I/S46F/S48P/S50F/T51A/D80N/R83S/K92N/N115K/V120P/G121S/N135K/T153K/Q173R/N176Y                                           | 21.628782  | 21.72857143 |
| 19             | G14H/R21T/L43I/S46F/S48P/S50F/T51A/D80N/R83S/K92N/N115K/V120P/G121S/N135K/S152N/T153R/E159A/F161P/F165S/Q173R/N176Y/Y180H             | 21.628618  | 21.72857143 |
| 20             | G14H/R21T/L43I/S46F/S48P/S50F/T51A/D80N/R83S/K92N/L127R/T153K/Q173R/N176Y/P196S                                                       | 21.614859  | 21.71428571 |
| 21             | L43I/S46F/S48P/S50F/T51A/D80N/R83S/K92N/L127R/T153K/N176Y                                                                             | 21.614059  | 21.71428571 |
| 22             | G14H/R21T/L43I/S46F/S48P/S50F/T51A/D80N/R83S/K92N/N115K/V120P/G121S/N135K/S152N/T153K/N156S/E159A/F161P/F165S/Q173R/N176Y/Y180H/P196S | 21.611968  | 21.8        |
| 23             | G14H/L43I/S46F/S48P/S50F/T51A/D80N/R83S/K92N/N115K/V120P/G121S/N135K/T153K/Q173R/N176Y                                                | 21.571834  | 21.67142857 |
| 24             | G14H/R21T/A23T/L43I/S46F/S48P/S50F/T51A/D80N/R83S/K92N/N115K/V120P/G121S/N135K/S152N/T153R/E159A/F161P/F165S/Q173R/N176Y              | 21.564687  | 21.68571429 |
| 25             | G14H/R21T/L43I/S46F/S48P/S50F/T51A/D80N/R83S/K92N/N115K/V120P/G121S/N135K/Q149R/S152N/T153K/E159A/F161P/F165S/Q173R/N176Y/Y180H       | 21.554642  | 22.94285714 |
| 26             | G14H/R21T/L43I/S46F/S48P/S50F/T51A/D80N/R83S/K92N/N115K/V120P/G121S/N135K/S152N/T153K/E159A/F161P/F165S/Q173R/N176Y/P196S             | 21.523667  | 21.72857143 |
| 27             | G14H/R21T/L43I/S46F/S48P/S50F/T51A/D80N/R83S/K92N/N115K/V120P/G121S/N135K/S152N/T153R/E159A/F161P/F165S/Q173R/N176Y                   | 21.512653  | 21.37142857 |
| 28             | G14H/R21T/L43I/S46F/S48P/S50F/T51A/D80N/R83S/K92N/N115K/V120P/G121S/N135K/T153K/Q173R/N176Y/P196S                                     | 21.488359  | 21.34285714 |
| 29             | L43I/S46F/S48P/S50F/T51A/D80N/R83S/K92N/L127R/T153K                                                                                   | 21.418949  | 21          |
| 30             | G14H/R21T/A23S/L43I/S46F/S48P/S50F/T51A/D80N/R83S/K92N/N115K/V120P/G121S/N135K/S152N/T153K/E159A/F161P/F165S/Q173R/N176Y/Y180H        | 21.399839  | 21.5        |
| 31             | G14H/R21T/S46F/S48P/S50F/T51A/D80N/R83N/K92N/N115K/K119T/G121S/L127R/N135K/S152N/T153K/E159A/F161S/Q173R/N176Y/Y180H                  | 21.386046  | 21.64285714 |
| 32             | G14D/R21T/S46F/S48P/S50F/T51A/D80N/R83S/K92N/N115K/K119T/L127R/N135K/S152N/T153K/E159A/F161V/Q173R/N176Y/Y180H/P196T                  | 21.314379  | 21.21428571 |
| 33             | G14H/R21T/L43I/S46F/S48P/S50F/T51A/D80N/R83S/K92N/N115K/V120P/G121S/N135K/S152N/T153K/E159V/F161P/F165S/Q173R/N176Y/Y180H             | 21.28557   | 21.38571429 |
| 34             | G14H/L43I/S46F/S48P/S50F/T51A/D80N/R83S/K92N/N115K/V120P/G121S/N135K/S152N/T153K/E159A/F161P/F165S/Q173R/N176Y/Y180H                  | 21.285515  | 21.18571429 |
| 35             | G14H/R21T/L43I/S46F/S48P/S50F/T51A/D80N/R83S/K92N/N115K/V120P/G121S/N135K/S152N/T153K/V158L/E159A/F161P/F165S/Q173R/N176Y/Y180H       | 21.284091  | 22.92857143 |
| 36             | G14H/R21T/A23T/L43I/S46F/S48P/S50F/T51A/D80N/R83S/K92N/N115K/V120P/G121S/N135K/S152N/T153K/E159A/F161P/F165S/Q173R/N176Y/Y180H        | 21.236337  | 20.5        |

|    |                                                                                                                                 |           |             |
|----|---------------------------------------------------------------------------------------------------------------------------------|-----------|-------------|
| 37 | G14H/R21T/L43I/S46F/S48P/S50F/T51A/D80N/R83S/K92N/N115K/V120P/G121S/F131L/N135K/S152N/T153K/E159A/F161P/F165S/Q173R/N176Y/Y180H | 21.22645  | 22.48571429 |
| 38 | G14H/R21T/L43I/S46F/S48P/S50F/T51A/D80N/R83S/K92N/N115K/V120P/G121S/N135K/S152N/T153K/N156T/E159A/F161P/F165S/Q173R/N176Y/Y180H | 21.19994  | 21.3        |
| 39 | G14H/R21T/L43I/S46F/S48P/S50F/T51A/D80N/R83S/K92N/N115K/V120P/G121S/N135K/S152N/T153K/E159A/F161P/F165S/Q173R/N176Y/Y180H       | 21.190593 | 20.88571429 |
| 40 | G14H/R21T/L43I/S46F/S48P/S50F/T51A/D80N/R83S/K92N/N115K/K119T/L127R/N135K/S152N/T153K/E159A/F161V/F165S/Q173R/N176Y/Y180H       | 21.171184 | 21.27142857 |
| 41 | G14H/R21T/L43I/S46F/S48P/S50F/T51A/D80N/R83S/K92N/V108I/N115K/V120P/G121S/N135K/S152N/T153K/E159A/F161P/F165S/Q173R/N176Y/Y180H | 21.152518 | 21.71428571 |
| 42 | G14H/R21T/K31T/S46F/S48P/S50F/T51A/D80N/R83S/K92N/N115K/G121S/N135K/S152N/T153K/E159A/F165S/S169P/Q173R/N176Y/Y180H             | 21.141607 | 22.24285714 |
| 43 | G14D/S46F/S48P/S50F/T51A/D80N/R83S/K92N/N115K/N125D/L127R/S152N/T153K/E159A/F161V/Q173R/N176Y/Y180H                             | 21.099786 | 21          |
| 44 | G14H/R21T/A23V/L43I/S46F/S48P/S50F/T51A/D80N/R83S/K92N/N115K/V120P/G121S/N135K/S152N/T153K/E159A/F161P/F165S/Q173R/N176Y/Y180H  | 21.089292 | 21.24285714 |
| 45 | G14H/R21T/L43I/S46F/S48P/S50F/T51A/D80N/R83S/K92N/N115K/V120P/G121S/N135K/S152N/T153K/E159A/F161P/F165S/Q173R/N176Y             | 21.066766 | 20.88571429 |
| 46 | G14H/R21T/S46F/S48P/S50F/T51A/D80N/R83S/K92N/N115K/G121S/N135K/S152N/T153K/E159A/F161P/F165S/Q173R/N176Y/Y180H                  | 21.057234 | 20.95714286 |
| 47 | G14D/S46F/S48P/S50F/T51A/D80N/R83S/K92N/N115K/K119R/G121S/N125D/L127M/N135K/S152N/T153K/E159R/F161S/Q173R/N176Y/Y180H           | 21.042702 | 20.94285714 |
| 48 | G14H/R21T/S46F/S48P/S50F/T51A/D80N/R83S/K92N/N115K/G121S/L127R/N135K/S152N/T153K/E159A/F161I/Q173R/N176Y/Y180H                  | 21.031587 | 21          |
| 49 | G14H/R21T/L43I/S46F/S48P/S50F/T51A/D80N/R83S/K92N/N115K/V120P/G121S/N135K/S152N/T153K/F161S/F165S/Q173R/N176Y/P196T             | 21.021116 | 20.87142857 |
| 50 | G14D/R21T/S46F/S48P/S50F/T51A/D80N/R83S/K92N/N115K/K119T/L127R/N135K/S152N/T153K/E159A/F161V/Q173R/N176Y/Y180H                  | 21.018019 | 20.91428571 |
| 51 | G14D/S46F/S48P/S50F/T51A/D80N/R83S/K92N/N115K/K119T/L127R/N135K/S152N/T153K/E159A/F161V/Q173R/N176Y/Y180H                       | 21.01453  | 20.91428571 |
| 52 | G14H/R21T/L43I/S46F/S48P/S50F/T51A/D80N/R83S/K92N/N115K/V120P/G121S/N135K/S152N/T153K/E159A/F161S/F165S/Q173R/N176Y/P196Q       | 21.000155 | 20.9        |
| 53 | G14H/R21T/S46F/S48P/S50F/T51A/D80N/R83S/K92N/N115K/K119T/G121S/L127R/N135K/S152N/T153K/E159A/F161S/Q173R/N176Y/Y180H            | 20.999668 | 20.9        |
| 54 | G14H/R21T/K31T/S46F/S48P/S50F/T51A/D80N/R83S/K92N/N115K/G121S/N135K/S152N/T153K/E159A/F161V/F165S/Q173R/N176Y/Y180H             | 20.977562 | 20.95714286 |
| 55 | L127R/T153K                                                                                                                     | 20.945878 | 21.57142857 |
| 56 | G14D/S46F/S48P/S50F/T51A/D80N/R83S/K92N/N115K/K119T/L127R/N135K/S152N/T153K/E159A/F161V/Q173R/N176Y                             | 20.905308 | 20.87142857 |
| 57 | G14H/R21T/S46F/S48P/S50F/T51A/D80N/R83S/K92N/N115K/K119T/G121S/L127R/N135K/S152N/T153K/E159A/F161S/Q173R/N176Y/P196S            | 20.903401 | 21.17142857 |
| 58 | G14H/R21T/K31T/S46F/S48P/S50F/T51A/D80N/R83S/K92N/N115K/G121S/N135K/S152N/T153K/E159A/F165S/Q173R/N176Y/Y180H                   | 20.885432 | 20.98571429 |
| 59 | G14H/R21T/L43I/S46F/S48P/S50F/T51A/D80N/R83S/K92N/N115K/V120P/G121S/N135K/S152N/T153K/E159A/F161S/F165S/Q173R/N176Y/Y180H/P196S | 20.876965 | 21.48571429 |
| 60 | G14H/R21T/L43I/S46F/S48P/S50F/T51A/D80N/R83S/K92N/N115K/V120P/G121S/N135K/S152N/T153R/E159A/G160R/F161S/F165S/Q173R/N176Y       | 20.82189  | 21.81428571 |
| 61 | G14H/R21T/L43I/S46F/S48P/S50F/T51A/D80N/R83S/K92N/N115K/V120P/G121S/N135K/T153K/E159A/F161S/F165S/Q173R/N176Y/Y180H             | 20.780254 | 20.84285714 |
| 62 | G14H/R21T/L43I/S46F/S48P/S50F/T51A/D80N/R83S/K92N/N115K/V120P/G121S/N135K/S152N/T153K/E159A/F161S/F165S/Q173R/N176Y/Y180H       | 20.495018 | 19.35714286 |
| 63 | G14H/R21T/L43I/S46F/S48P/S50F/T51A/D80N/R83S/K92N/V120P/N135K/S152N/T153K/E159A/F161S/Q173R/N176Y/Y180H                         | 20.385706 | 20.28571429 |
| 64 | G14H/R21T/L43I/S46F/S48P/S50F/T51A/D80N/R83S/K92N/N115K/V120P/G121S/N135K/S152N/T153K/E159A/F161S/F165S/Q173R/N176Y             | 20.36888  | 19.51428571 |
| 65 | G14H/R21T/S46F/S48P/S50F/T51A/D80N/R83S/K92N/N115K/V120P/G121S/N135K/S152N/T153K/E159A/F161S/F165S/Q173R/N176Y                  | 20.239549 | 19.64285714 |
| 66 | G14H/R21T/L43I/S46F/S48P/S50F/T51A/D80N/R83S/K92N/N115K/V120P/G121S/N135K/S152N/T153K/E159A/F161S/F165S/Q173R                   | 20.126684 | 20.6        |
| 67 | G14H/R21T/L43I/S46F/S48P/S50F/T51A/D80N/K92N/N115K/V120P/G121S/N135K/S152N/T153K/E159A/F161S/F165S/Q173R/N176Y/Y180H            | 19.68554  | 19.58571429 |
